# Supplementary material for: Effect of Exercise Repetitions on Arylesterase Activity of PON1 in Plasma of Average-Trained Men—The Dissociation between Activity and Concentration
Source: MDPI journal article supplement (doi:10.3390/antiox12061296), 2023-06-17
Supplement: s1 [file s1]

**Supplementary material for**

**Effect of exercise repetitions on arylesterase activity of PON1 in plasma of average-trained men – dissociation between activity and concentration**

Aneta Otocka-Kmiecik, Monika Orłowska-Majdak, Robert Stawski, Urszula Szkudlarek, Gianluca Padula, Szymon Gałczyński, Dariusz Nowak

**Supplementary Table S1.** Individual data of pre- and post-exercise arylesterase activity (ARE) in average-trained men at each of the three exercise repetitions

| ARE (U/mL) | Participant number | 1st bout     |               | 2nd bout     |               | 3rd bout     |               |
|------------|--------------------|--------------|---------------|--------------|---------------|--------------|---------------|
|            |                    | Pre-exercise | Post-exercise | Pre-exercise | Post-exercise | Pre-exercise | Post-exercise |
|            | 1                  | 92.7         | 63.7          | 89.1         | 90.7          | 57.5         | 91.2          |
|            | 2                  | 153.9        | 130.6         | 234.2        | 242.5         | 160.1        | 160.6         |
|            | 3                  | 123.3        | 187.0         | 177.7        | 188.1         | 143.5        | 171.0         |
|            | 4                  | 166.3        | 128.5         | 152.3        | 134.7         | 126.4        | 81.9          |
|            | 5                  | 224.9        | 165.8         | 218.7        | 239.4         | 174.1        | 178.2         |
|            | 6                  | 177.2        | 229.5         | 305.7        | 190.7         | 104.7        | 232.1         |
|            | 7                  | 117.1        | 211.9         | 134.7        | 161.1         | 132.1        | 148.2         |
|            | 8                  | 120.7        | 164.2         | 65.3         | 159.6         | 147.7        | 135.2         |
|            | 9                  | 256.5        | 167.9         | 166.8        | 97.4          | 160.1        | 139.9         |
|            | 10                 | 157.0        | 114.0         | 132.1        | 82.9          | 85.0         | 79.3          |
|            | 11                 | 92.2         | 67.9          | 86.5         | 50.8          | 97.9         | 77.2          |

**Supplementary Table S2.** Individual data of pre- and post-exercise paraoxonase 1 concentration (PON1c) in average-trained men at each of the three exercise repetitions

| PON1C (µg/mL) | Participant number | 1st bout     |               | 2nd bout     |               | 3rd bout     |               |
|---------------|--------------------|--------------|---------------|--------------|---------------|--------------|---------------|
|               |                    | Pre-exercise | Post-exercise | Pre-exercise | Post-exercise | Pre-exercise | Post-exercise |
|               | 1                  | 1,55         | 2,95          | 1,28         | 1,99          | 1,32         | 2,21          |
|               | 2                  | 1,19         | 2,15          | 1,14         | 2,22          | 1,24         | 2,2           |
|               | 3                  | 1,42         | 2,86          | 1,3          | 3,42          | 1,39         | 3,59          |
|               | 4                  | 1,46         | 2,7           | 1,56         | 3,67          | 1,64         | 2,91          |
|               | 5                  | 1,62         | 2,66          | 2,04         | 3,33          | 1,93         | 3,92          |
|               | 6                  | 1,21         | 2,03          | 1,15         | 1,99          | 1,31         | 1,66          |
|               | 7                  | 1,51         | 1,96          | 1,62         | 2,43          | 1,68         | 2,58          |
|               | 8                  | 1,29         | 3,15          | 1,28         | 3,4           | 1,36         | 3,97          |
|               | 9                  | 1,74         | 2,42          | 1,57         | 2,46          | 1,65         | 2,13          |
|               | 10                 | 1,98         | 2,12          | 2,24         | 3,31          | 2,21         | 2,23          |
|               | 11                 | 2,83         | 4,31          | 1,84         | 4,63          | 1,95         | 3,96          |

**Supplementary Table S3.** Individual data of pre- and post-exercise arylesterase / paraoxonase 1 concentration (ARE/PON1c) in average-trained men at each of the three exercise repetitions

| ARE/PON1c | Participant number | 1st bout     |               | 2nd bout     |               | 3rd bout     |               |
|-----------|--------------------|--------------|---------------|--------------|---------------|--------------|---------------|
|           |                    | Pre-exercise | Post-exercise | Pre-exercise | Post-exercise | Pre-exercise | Post-exercise |
|           | 1                  | 59.8         | 21.6          | 69.6         | 45.6          | 43.6         | 41.3          |
|           | 2                  | 129.3        | 60.7          | 205.4        | 109.2         | 129.1        | 73.0          |
|           | 3                  | 86.8         | 65.4          | 136.7        | 55.0          | 103.3        | 47.6          |
|           | 4                  | 113.9        | 47.6          | 97.7         | 36.7          | 77.1         | 28.1          |
|           | 5                  | 138.8        | 62.3          | 107.2        | 71.9          | 90.2         | 45.5          |
|           | 6                  | 146.4        | 113.1         | 265.8        | 96.0          | 79.9         | 139.8         |
|           | 7                  | 77.5         | 108.1         | 83.2         | 66.3          | 78.7         | 57.4          |
|           | 8                  | 93.6         | 52.1          | 51.0         | 46.9          | 108.6        | 34.1          |
|           | 9                  | 147.4        | 69.4          | 106.3        | 39.6          | 97.0         | 65.7          |
|           | 10                 | 79.3         | 53.8          | 59.0         | 25.0          | 38.5         | 35.6          |
|           | 11                 | 32.6         | 15.8          | 47.0         | 11.0          | 50.2         | 19.5          |

**Supplementary Table S4.** Biochemical measurements data distribution tested using Shapiro-Wilk test with visual inspection of histograms (n=11)

| Biochemical measurements                                                   | 1st bout         |                   | 2nd bout         |                  | 3rd bout        |                  |
|----------------------------------------------------------------------------|------------------|-------------------|------------------|------------------|-----------------|------------------|
|                                                                            | Pre-exercise     | Post-exercise     | Pre-exercise     | Post-exercise    | Pre-exercise    | Post-exercise    |
|                                                                            | W (p)            | W (p)             | W (p)            | W (p)            | W (p)           | W (p)            |
| <b>Arylesterase activity (ARE) (U/mL)</b>                                  | 0.92, (0.32), N  | 0.95, (0.70), N   | 0.96, (0.72), N  | 0.95, (0.64), N  | 0.95, (0.68), N | 0.92, (0.32), N  |
| <b>Paraoxonase activity (PON) (U/L)</b>                                    | 0.84, (0.04), NN | 0.80, (0.01), NN  | 0.92, (0.29), N  | 0.93, (0.45), N  | 0.80,(0.01), NN | 0.93, (0.37), N  |
| <b>Paraoxonase 1 concentration (PON1c) (µg/mL)</b>                         | 0.80, (0.01), NN | 0.87, (0.08), N   | 0.91, (0.25), N  | 0.91, (0.28), N  | 0.91, (0.24), N | 0.86, (0.07), N  |
| <b>Arylesterase activity/paraoxonase 1 concentration (ARE/PON1c)</b>       | 0.94, (0.54), N  | 0.92, (0.31), N   | 0.84, (0.03), NN | 0.96, (0.81), N  | 0.96,( 0.73), N | 0.81, (0.01), NN |
| <b>Ferric reducing activity of plasma (FRAP) (mM/L Fe<sup>+2</sup>)</b>    | 0.95, (0.58), N  | 0.89, (0.13), N   | 0.95, (0.61), N  | 0.98, (0.94), N  | 0.95, (0.61), N | 0.99, (0.99), N  |
| <b>High-density lipoprotein (HDL) (mM/L)</b>                               | 0.91, (0.27), N  | 0.95, (0.65), N   | 0.75, (0.00), NN | 0.81, (0.01), NN | 0.85,(0.04), NN | 0.89, (0.15), N  |
| <b>C-reactive protein (CRP) (mg/L)</b>                                     | 0.84, (0.03), NN | 0.76, (0.003), NN | 0.70, (0.01), NN | 0.64, (0.00), NN | 0.7, (0.01), NN | 0.74, (0.00), NN |
| <b>Lactate (mM/L)</b>                                                      | 0.92, (0.35), N  | 0.92, (0.35), N   | 0.84, (0.04), NN | 0.93, (0.43), N  | 0.87, (0.08), N | 0.94, (0.47), N  |
| <b>Creatine kinase (CK) (U/L)</b>                                          | 0.84, (0.03), NN | 0.67, (0.000), NN | 0.81, (0.01), NN | 0.84, (0.03), NN | 0.97, (0.90), N | 0.91, (0.24), N  |
| <b>White blood cells (WBC) (x10<sup>3</sup>/mm<sup>3</sup>)</b>            | 0.75, 0.002, NN  | 0.94, (0.47), N   | 0.94, (0.50), N  | 0.82, (0.02), NN | 0.92, (0.29), N | 0.87, (0.08), N  |
| <b>Polymorphonuclear leukocytes (PMN) (x10<sup>3</sup>/mm<sup>3</sup>)</b> | 0.92, 0.34, N    | 0.88, (0.10), N   | 0.95, (0.58), N  | 0.86, (0.05), NN | 0.93, (0.40), N | 0.87, (0.07), N  |

W – the value of the test statistics, (p) – p-value, N- normal distribution, NN-not normal distribution

**Supplementary Table S5.** Exercise parameters data distribution tested using Shapiro-Wilk test with visual inspection of histograms (n=11)

| Parameter                                                  | Exercise bout        |                      |                      |
|------------------------------------------------------------|----------------------|----------------------|----------------------|
|                                                            | 1 <sup>st</sup> bout | 2 <sup>nd</sup> bout | 3 <sup>rd</sup> bout |
|                                                            | W (p)                | W (p)                | W (p)                |
| <b>Maximal heart rate (HR) during exercise (beats/min)</b> | 0.92, (0.29), N      | 0.85, (0.048), NN    | 0.90, (0.18), N      |
| <b>Post-exercise systolic blood pressure (SBP) (mmHg)</b>  | 0.89, (0.14), N      | 0.90, (0.21), N      | 0.62, (0.0001), NN   |
| <b>Post-exercise diastolic blood pressure (DBP) (mmHg)</b> | 0.91, (0.29), N      | 0.81, (0.01), NN     | 0.83, (0.02), NN     |
| <b>Running distance (km)</b>                               | 0.88, (0.11), N      | 0.86, (0.051), N     | 0.80, (0.01), NN     |
| <b>Running time (min)</b>                                  | 0.89, (0.13), N      | 0.84, (0.03), NN     | 0.80, (0.01), NN     |

W – the value of the test statistics, (p) – p-value, N – normal distribution, NN – not normal distribution

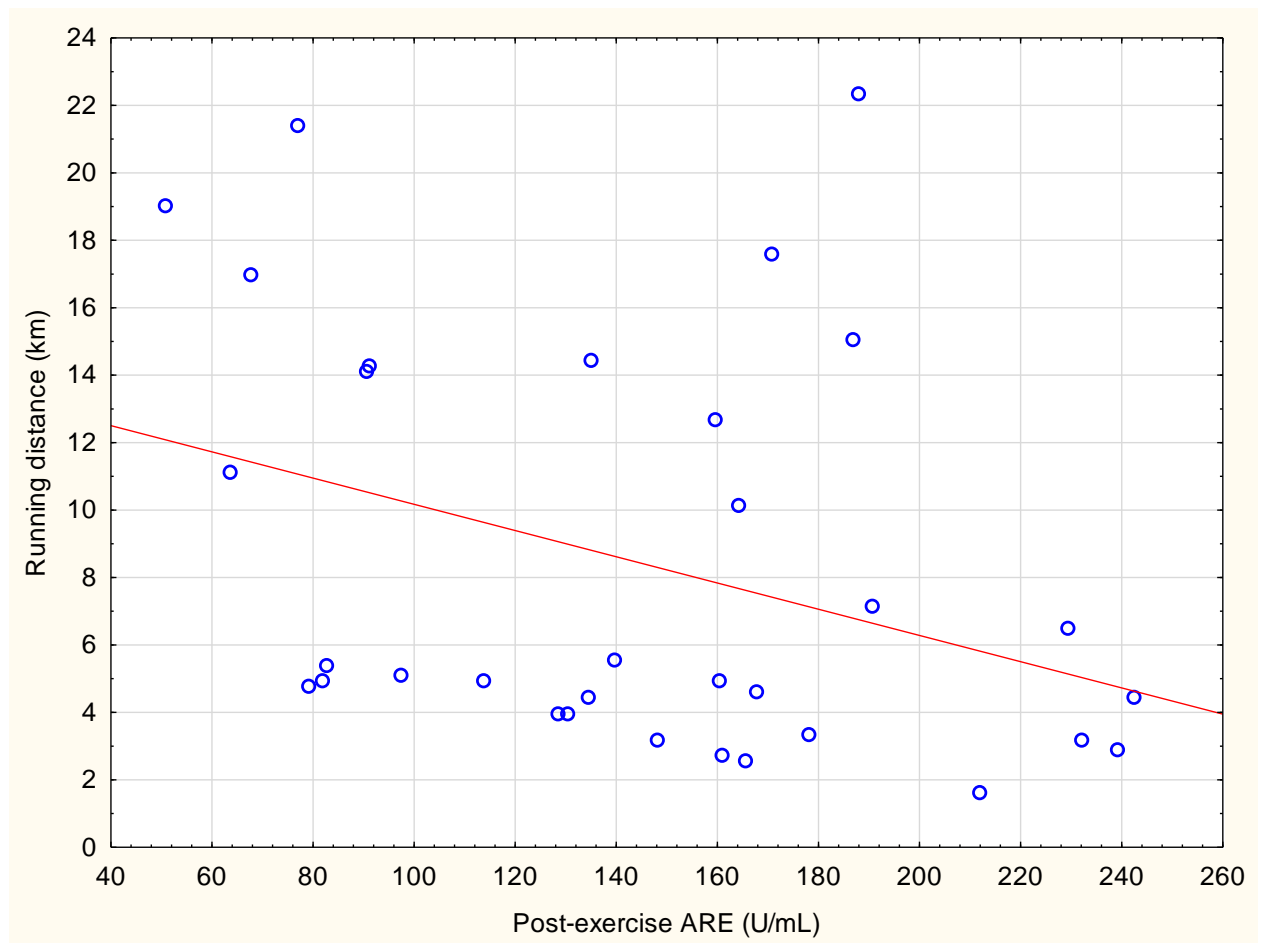

**Supplementary Figure S1.** Scatterplot of variables x and y. Correlation of post-exercise values of arylesterase (ARE) activity and running distance in the plasma of average trained men. Pooled individual data from three exercise bouts (n=33;  $\rho=-0.37$ ,  $p=0.042$ )

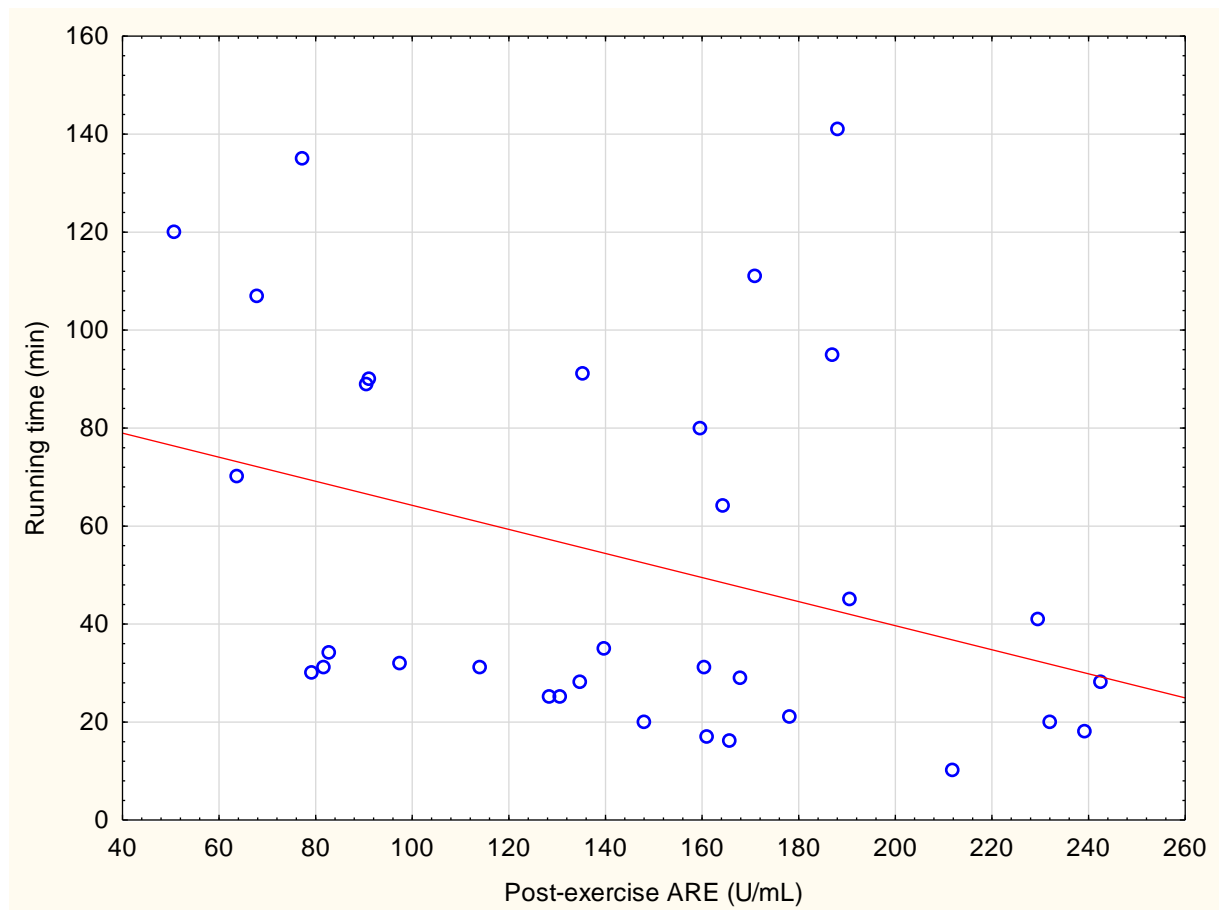

**Supplementary Figure S2.** Scatterplot of variables x and y. Correlation of post-exercise values of arylesterase (ARE) activity and running time in the plasma of average trained men. Pooled individual data from three exercise bouts (n=33;  $\rho=-0.37$ ,  $p=0.042$ )

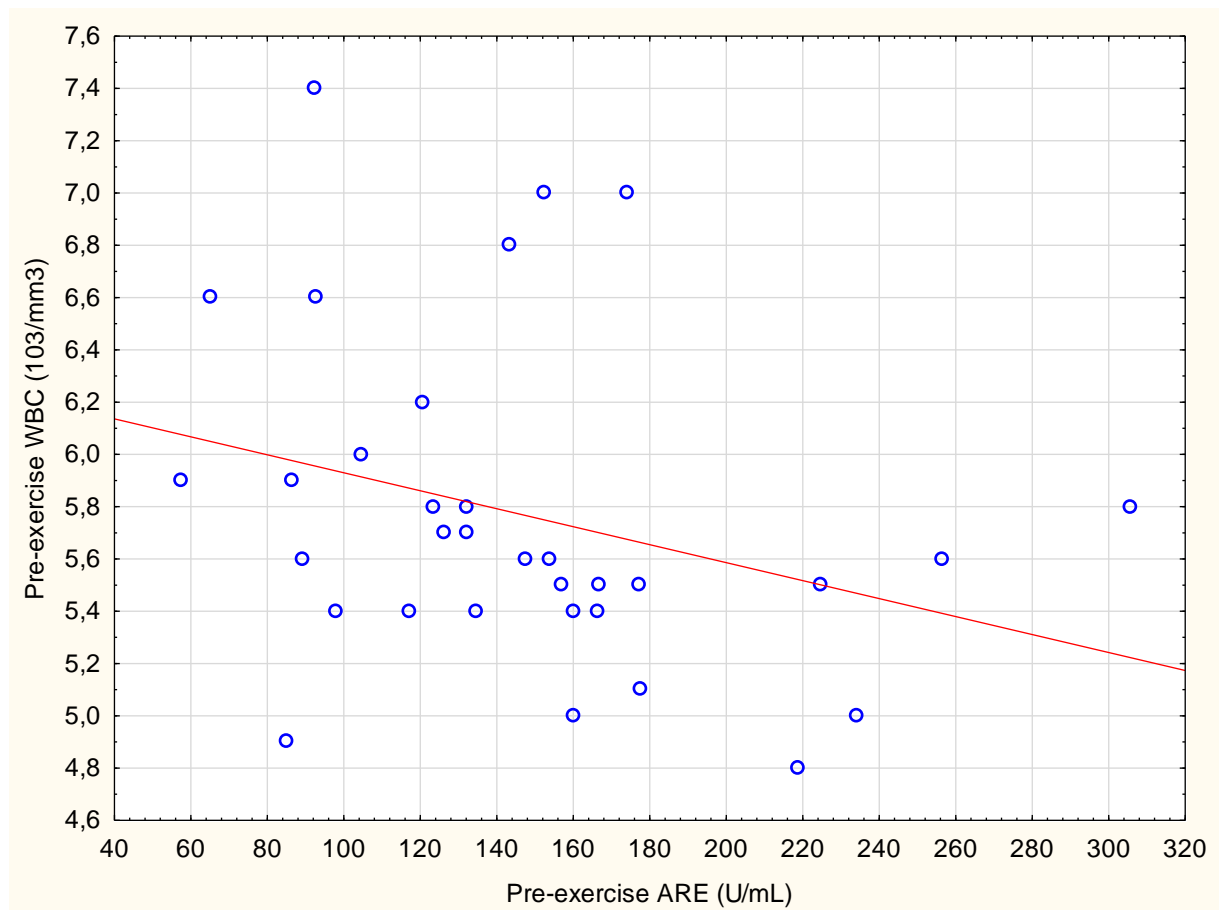

**Supplementary Figure S3.** Scatterplot of variables x and y. Correlation of pre-exercise values of arylesterase (ARE) activity and pre-exercise white blood cells (WBC) in the plasma of average trained men. Pooled individual data from three exercise bouts (n=33;  $\rho=-0.38$ ,  $p=0.03$ )

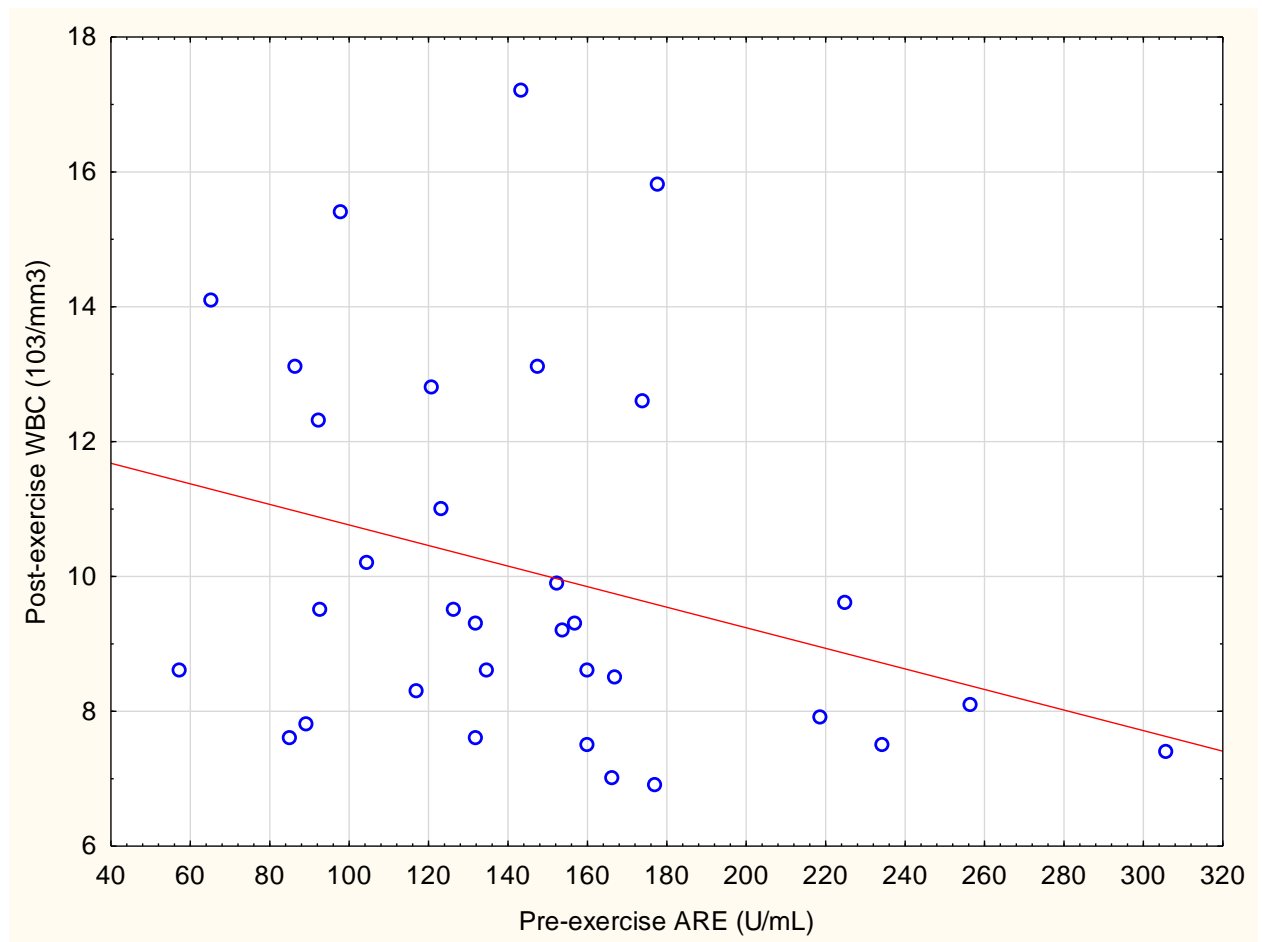

**Supplementary Figure S4.** Scatterplot of variables x and y. Correlation of pre-exercise values of arylesterase (ARE) activity and post-exercise white blood cells (WBC) in the plasma of average trained men. Pooled individual data from three exercise bouts (n=33;  $\rho=-0.35$ ,  $p=0.048$ )

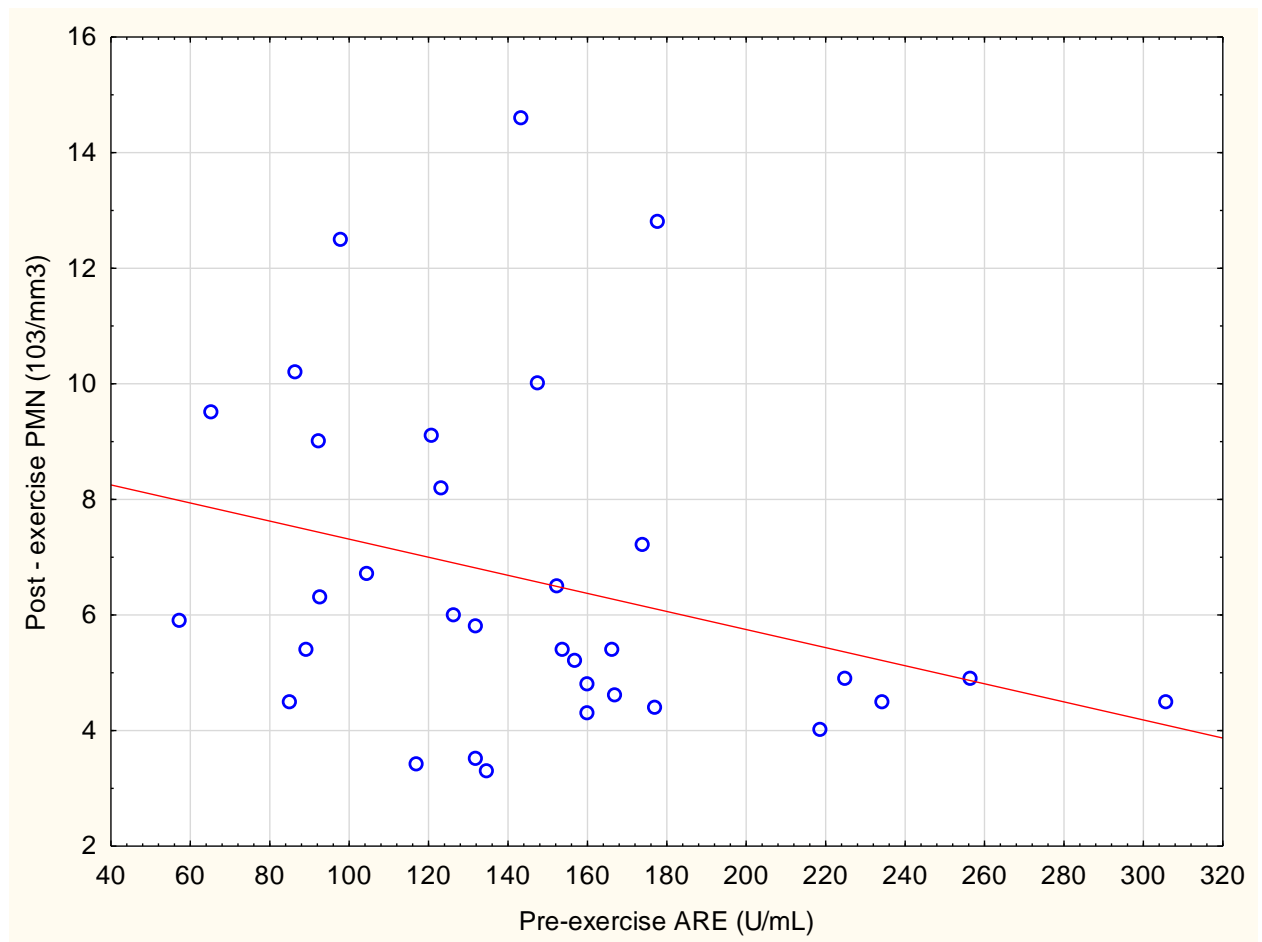

**Supplementary Figure S5.** Scatterplot of variables x and y. Correlation of pre-exercise values of arylesterase (ARE) activity and post-exercise polymorphonuclear leukocytes (PMN) in the plasma of average trained men. Pooled individual data from three exercise bouts ( $n=33$ ;  $\rho=-0.37$ ,  $p=0.037$ )

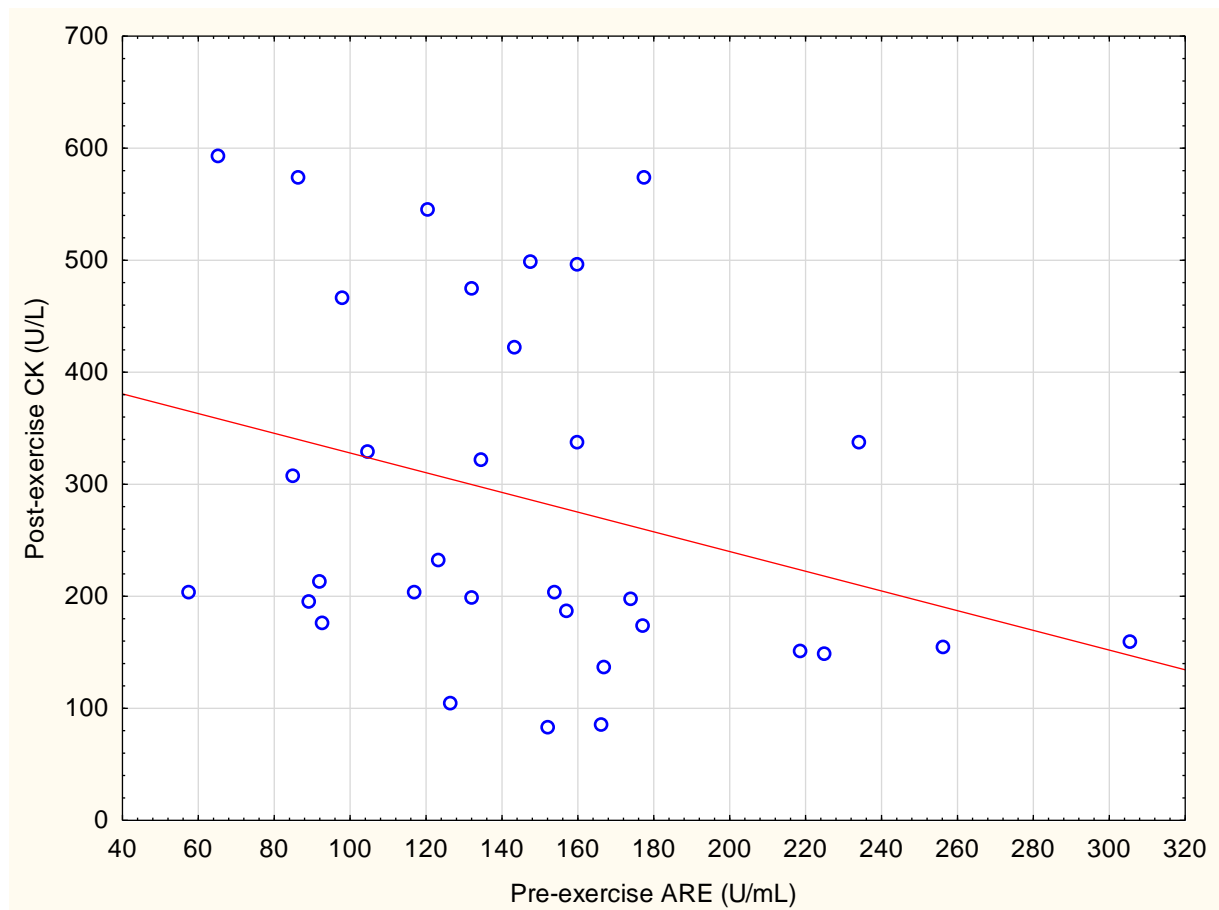

**Supplementary Figure S6.** Scatterplot of variables x and y. Correlation of pre-exercise values of ARE activity and post-exercise creatine kinase (CK) in the plasma of average trained men. Pooled individual data from three exercise bouts (n=33;  $r=-0.37$ ,  $p=0.036$ )
